# Supplementary material for: Profiling of Phenolic Compounds and Triterpene Acids of Twelve Apple (Malus domestica Borkh.) Cultivars
Source: MDPI journal article supplement (doi:10.3390/foods10020267), 2021-01-28
Supplement: s1 [file s1]

**Supplementary materials:**

**Table S1.** Analytical performances of the method used for the quantification of individual phenolic compounds in apple

| <b>Compound Name</b>          | <b><i>Linearity</i></b> | <b><i>R</i><sup>2</sup></b> | <b>LOD<br/>(mg/100g)</b> | <b>LOQ<br/>(mg/100g)</b> | <b>Precision<br/>(%)</b> | <b>Recovery<br/>(%)</b> |
|-------------------------------|-------------------------|-----------------------------|--------------------------|--------------------------|--------------------------|-------------------------|
| Caffeic acid                  | 1-50                    | 1.0000                      | 0.11                     | 0.42                     | 3.8                      | 74                      |
| Gallic acid                   | 1-50                    | 0.9977                      | 0.41                     | 1.32                     | 4.8                      | 75                      |
| Ferulic acid                  | 1-50                    | 0.9980                      | 0.10                     | 0.50                     | 3.3                      | 73                      |
| <i>p</i> -Coumaric acid       | 1-50                    | 0.9980                      | 0.11                     | 0.20                     | 2.8                      | 74                      |
| <i>p</i> -Hydroxybenzoic acid | 1-50                    | 0.9981                      | 0.10                     | 0.20                     | 4.1                      | 75                      |
| 3,4-Dihydroxybenzoic acid     | 1-50                    | 0.9970                      | 0.10                     | 0.30                     | 3.7                      | 74                      |
| <i>t</i> -Cinnamic acid       | 1-25                    | 0.9980                      | 0.10                     | 0.30                     | 4.7                      | 65                      |
| Chlorogenic acid              | 1-50                    | 0.9960                      | 0.13                     | 0.40                     | 1.0                      | 70                      |
| Catechin                      | 1-50                    | 0.9975                      | 0.16                     | 0.50                     | 4.6                      | 75                      |
| Epicatechin                   | 1-50                    | 0.9973                      | 0.09                     | 0.22                     | 4.1                      | 67                      |
| Quercetin                     | 1-50                    | 0.9960                      | 0.10                     | 0.30                     | 3.9                      | 85                      |
| Rutin                         | 1-50                    | 0.9979                      | 0.08                     | 0.25                     | 3.5                      | 76                      |
| <i>t</i> -Resveratrol         | 1-50                    | 0.9950                      | 0.21                     | 0.6                      | 3.8                      | 94                      |

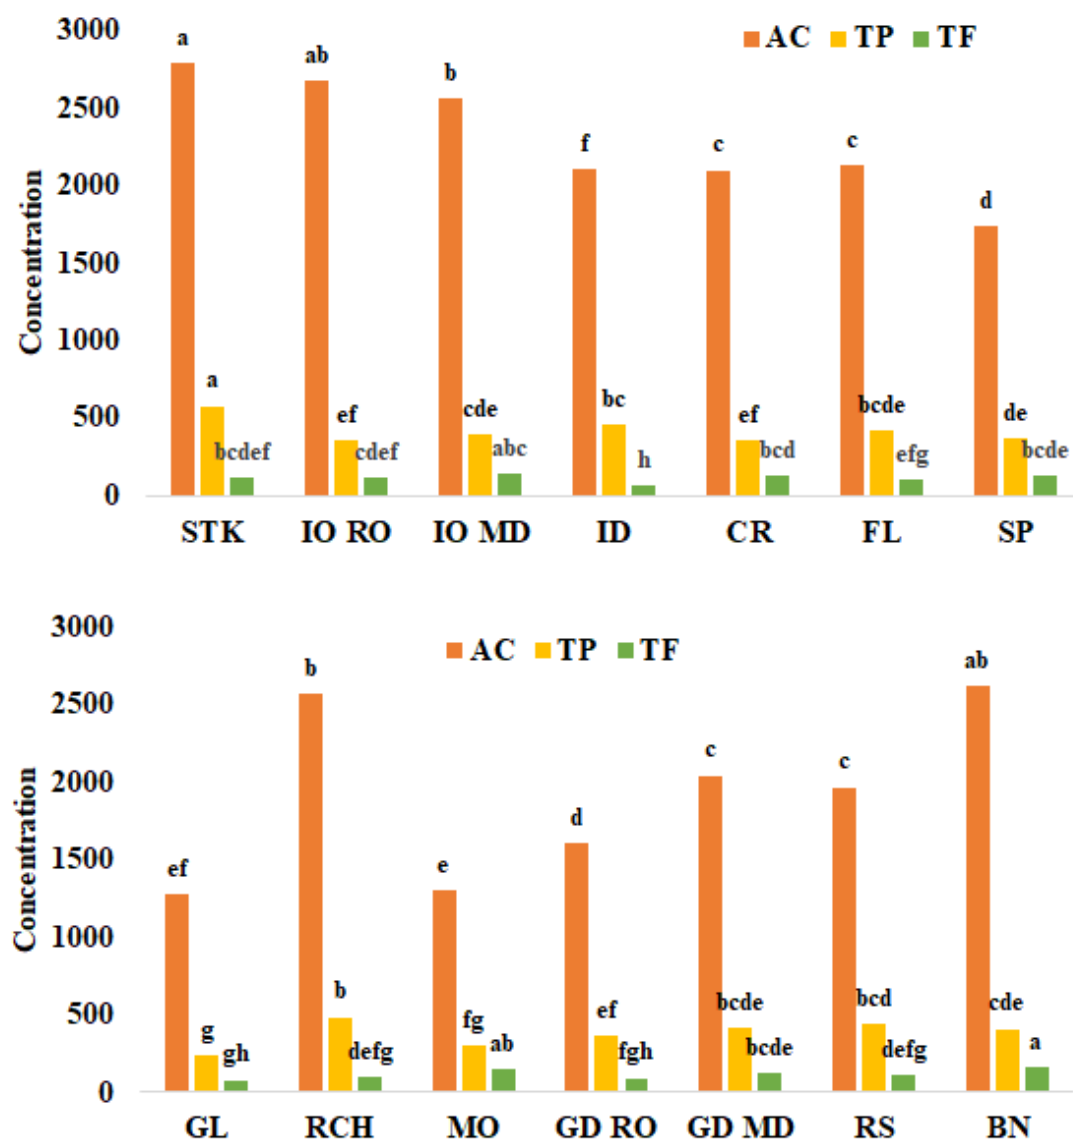

**Figure S1.** Antioxidant capacity (AC) ( $\mu\text{mol Trolox}/100\text{g DW}$ ), total polyphenols (TP) ( $\text{mg GAE}/100\text{g DW}$ ) and total flavonoids (TF) ( $\text{RU}/100\text{g DW}$ ) of different apple cultivars. Different letters denote significant differences according to Duncan test  $p \leq 0.05$ .
